# Supplementary material for: Delay in commencement of palliative care service episodes provided to Indigenous and non-Indigenous patients: cross-sectional analysis of an Australian multi-jurisdictional dataset
Source: BMC Palliat Care. 2018 Dec 22;17:130. doi: 10.1186/s12904-018-0380-7 (PMC6303928; doi:10.1186/s12904-018-0380-7)
Supplement: Supplementary file 1 — Table S1. Factors associated with delay (> 1 day) in commencing an episode of care. Percentage of episodes with delay (≥1 day), by category of each determinant, based on raw data. Crude and adjusted odds ratios for delay (≥1 day): sensitivity analyses of complete case compared with multiple imputation data. (XLSX 18 kb) [file 12904_2018_380_MOESM1_ESM.xlsx]

## Sheet: Table S1
	Table S1: Factors associated with delay (>1 day) in commencing an episode of care:
	Percentage of episodes with delay (≥1 day), by category of each determinant, based on raw data
	Crude and adjusted odds ratios for delay (≥1 day): sensitivity analyses of complete case compared with multiple imputation data
			Raw data		Logistic regression: complete case data					Logistic regression: multiple imputation data
	Determinant	Category	Episodes with delay (%)		Crude OR (95% CI)a	P value	Adjusted OR (95% CI)a,b	P value		Crude OR (95% CI)a	P value	Adjusted OR (95% CI)a,b	P value
	Person-level determinants:c
	Indigenous Identifier	Non-Indigenous		8.4	Reference		Reference			Reference		Reference
		Indigenous		8.3	0.99 (0.72–1.36)	0.96	1.31 (0.97–1.76)	0.08		1.07 (0.80–1.42)	0.66	1.44 (1.09–1.90)	0.01
	Age group (years)	<65		8.6	Reference		Reference			Reference		Reference
		≥65		8.3	1.02 (0.95–1.10)	0.55	1.01 (0.94–1.09)	0.71		1.00 (0.93–1.07)	0.92	1.02 (0.95–1.09)	0.65
	Sex	Female		8.5	Reference		Reference			Reference		Reference
		Male		8.3	0.97 (0.90–1.03)	0.28	0.99 (0.93–1.05)	0.73		0.97 (0.91–1.03)	0.29	1.00 (0.94–1.06)	0.89
	Principal diagnosis category	Cancer		8.6	Reference		Reference			Reference		Reference
		Other		7.7	0.87 (0.80–0.95)	<0.001	0.96 (0.88–1.04)	0.32		0.85 (0.78–0.91)	<0.001	0.95 (0.88–1.03)	0.22
	Patient residence based-data
	(i) Remoteness categoryd	Major City		8.7	Reference		Reference			Reference		Reference
		Inner Regional		7.4	0.80 (0.73–0.87)	<0.001	0.70 (0.63–0.78)	<0.001		0.85 (0.78–0.92)	<0.001	0.76 (0.69–0.84)	<0.001
		Outer Regional		7.7	0.90 (0.78–1.04)	0.17	0.67 (0.57–0.78)	<0.001		0.94 (0.82–1.07)	0.34	0.74 (0.64–0.86)	<0.001
		Remote/ Very Remote		10.8	1.25 (0.79–1.99)	0.34	1.26 (0.79–2.00)	0.33		1.41 (0.96–2.06)	0.08	1.99 (1.35–2.94)	0.001
	(ii) Social disadvantage (quintile)e	1 (Most disadvantaged)		8.9	Reference		Reference			Reference		Reference
		2		7.4	0.76 (0.67–0.85)	<0.001	0.96 (0.86–1.08)	0.53		0.75 (0.67–0.84)	<0.001	0.96 (0.86–1.07)	0.41
		3		8.5	0.91 (0.81–1.01)	0.07	1.19 (1.08–1.33)	<0.001		0.91 (0.83–1.01)	0.08	1.22 (1.10–1.35)	<0.001
		4		8.8	0.94 (0.85–1.04)	0.25	1.16 (1.04–1.29)	0.01		0.94 (0.85–1.04)	0.23	1.18 (1.07–1.31)	0.001
		5 (Least disadvantaged)		8.3	0.89 (0.81–0.99)	0.03	0.97 (0.88–1.08)	0.62		0.86 (0.79–0.95)	0.002	0.98 (0.88–1.08)	0.66
	Episode-level determinants:
	Setting of caref	Hospital		3.7	Reference		Reference			Reference		Reference
		Community		14.3	5.18 (4.81–5.59)	<0.001	4.48 (4.15–4.83)	<0.001		4.99 (4.67–5.34)	<0.001	4.04 (3.77–4.34)	<0.001
	Episode sequence	First		7.2	Reference		Reference			Reference		Reference
		Subsequent		11	1.59 (1.49–1.70)	<0.001	1.45 (1.37–1.55)	<0.001		1.63 (1.54–1.73)	<0.001	1.48 (1.39–1.57)	<0.001
	Episode sequence within setting	First/Hospital		4	Reference		Reference			Reference		Reference
		Subsequent/Hospital		3.1	0.72 (0.63–0.83)	<0.001	0.75 (0.65–0.86)	<0.001		0.73 (0.65–0.83)	<0.001	0.75 (0.66–0.85)	<0.001
		First/Community		11.6	Reference		Reference			Reference		Reference
		Subsequent/Community		19.3	1.91 (1.77–2.07)	<0.001	1.88 (1.74–2.02)	<0.001		1.99 (1.85–2.14)	<0.001	1.94 (1.81–2.09)	<0.001
	Calendar period	Jul 2013–Jun 2014		9.1	Reference		Reference			Reference		Reference
		Jul 2014–Jun 2015		7.7	0.79 (0.74–0.84)	<0.001	0.82 (0.77–0.88)	<0.001		0.82 (0.77–0.87)	<0.001	0.83 (0.78–0.88)	<0.001
	Palliative care problems at episode startg
	(i) Pain	Mild/absent		9	Reference		Reference			Reference		Reference
		Moderate/Severe		6.5	0.66 (0.61–0.71)	<0.001	0.85 (0.79–0.92)	<0.001		0.68 (0.63–0.73)	<0.001	0.87 (0.81–0.94)	<0.001
	(ii) Other symptoms	Mild/absent		8.9	Reference		Reference			Reference		Reference
		Moderate/Severe		7.6	0.81 (0.76–0.86)	<0.001	0.91 (0.85–0.97)	0.01		0.81 (0.77–0.86)	<0.001	0.91 (0.86–0.98)	0.007
	(iii) Psychological/Spiritual	Mild/absent		8.4	Reference		Reference			Reference		Reference
		Moderate/Severe		7.9	0.88 (0.82–0.95)	<0.001	1.02 (0.94–1.10)	0.68		0.92 (0.86–0.98)	0.01	1.07 (0.99–1.15)	0.11
	(iv) Family/carer	Mild/absent		8.2	Reference		Reference			Reference		Reference
		Moderate/Severe		8.2	0.96 (0.90–1.03)	0.24	0.97 (0.90–1.04)	0.42		0.97 (0.91–1.03)	0.32	0.97 (0.91–1.04)	0.42
	Functional status (tertile)h	Most independent		10.9	Reference		Reference			Reference		Reference
		Intermediate		8.5	0.74 (0.69–0.80)	<0.001	1.04 (0.97–1.12)	0.25		0.73 (0.68–0.78)	<0.001	1.02 (0.95–1.09)	0.59
		Least independent		5.4	0.43 (0.40–0.47)	<0.001	0.91 (0.83–1.00)	0.04		0.43 (0.39–0.46)	<0.001	0.88 (0.81–0.96)	0.002
	a. Odds ratio (OR) estimates based on multiple imputation of missing values with logistic regression models accounting for unbalanced clustering of data (one or more episodes of care experienced by each patient)
	b. Adjustment for main effects of all other listed determinants and for jurisdiction, with calendar period modelled as a categorical variable comprising two 12-month intervals. Data on individual jurisdiction as a determinant are not presented.
	c. Person-level data, including those related to residence, are recorded once at a person’s first episode of care by a service
	d. Australian Statistical Geography Standard (ASGS) [14]
	e. Socio-Economic Index for Areas (SEIFA) Index of Relative Socio-Economic Advantage and Disadvantage (IRSAD) [13]
	f. ‘Hospital’ category combines admitted overnight, same-day admission, and outpatient attendance
	g. Pain, Other Symptoms, Psychological/Spiritual and Family/Carer are the four domains of the clinician-rated Palliative Care Problem Severity Score (PCPSS) [16]
	h. Resource Utilisation Groups–Activities of Daily Living (RUG-ADL) total score
